# Supplementary material
Source: PubMed Central journal article supplement (PMC4036643)
Supplement: NIHMS579448-supplement-01.pdf [file NIHMS579448-supplement-01.pdf]

## Additional papers

The search strategy was conducted in December 2012 with 7 new papers (2011 – 2012) found to be eligible after full review. The search was repeated in October 2013. A single paper, Tekin et al., was found to be potentially eligible. It has yet to be formally evaluated.

| Reference                                                                                                                                                                                                        | Sample                                                                                                                                                                         | Design                                                                                                                                                                                                                                                                              | Main Findings                                                                                                                                                                                               | Consistency with ATC results                                                                                                                                    | Quality of blinding    |
|------------------------------------------------------------------------------------------------------------------------------------------------------------------------------------------------------------------|--------------------------------------------------------------------------------------------------------------------------------------------------------------------------------|-------------------------------------------------------------------------------------------------------------------------------------------------------------------------------------------------------------------------------------------------------------------------------------|-------------------------------------------------------------------------------------------------------------------------------------------------------------------------------------------------------------|-----------------------------------------------------------------------------------------------------------------------------------------------------------------|------------------------|
| Li et al., 2011.<br>“Acupuncture for migraine prophylaxis: a randomized controlled trial”                                                                                                                        | Migraine patients<br>Acupuncture (Shaoyang-specific): N=121<br>Acupuncture (Shaoyang non-specific): N=119<br>Acupuncture (Yangming-specific): N=118<br>Sham Acupuncture: N=118 | Electrostimulation was used with acupuncture and sham acupuncture.<br>Sham acupuncture was performed by inserting needles at non-acupuncture points.                                                                                                                                | No statistically significant differences in early outcome between sham and true acupuncture for migraine prophylaxis. Differences became statistically significant with longer follow-up.                   | Despite non-significant results at early time point, the estimate of the effect size (~0.2) is similar to effect size in meta-analysis for acupuncture vs. sham | Low likelihood of bias |
| Ferro et al., 2012.<br>“The combined effect of acupuncture and Tanacetum parthenium on quality of life in women with headache: randomised study”                                                                 | Migraine patients<br>Acupuncture: N=23<br>Tanacetum: N=23<br>Acupuncture + Tanacetum: N=23                                                                                     | Acupuncture performed twice weekly for 10 weeks.<br>Patients in Tanacetum groups received 150mg Tanacetum per day.                                                                                                                                                                  | Acupuncture plus Tanacetum was statistically significantly more effective than acupuncture alone or Tanacetum alone when looking at change in health-related quality of life and pain scores from baseline. | Too small to have any substantive impact on the meta-analytic estimates, although general direction of results comparable                                       | Not applicable         |
| Mavrommatis et al., 2012<br>“Acupuncture as an adjunctive therapy to pharmacological treatment in patients with chronic pain due to osteoarthritis of the knee: A 3-armed, randomized, placebo-controlled trial” | Osteoarthritis patients<br>Verum acupuncture + etoricoxib: N=40<br>Sham acupuncture + etoricoxib: N=40<br>Etoricoxib only: N=40                                                | All patients received etoricoxib for 60 days.<br>Acupuncture performed twice weekly for 8 weeks.<br>Electrostimulation was used with acupuncture and sham acupuncture.<br>Sham acupuncture involved using Streitberger needles at the same acupuncture points as verum acupuncture. | Acupuncture + etoricoxib group had statistically significantly lower WOMAC sub-scores at the end of treatment than sham acupuncture + etoricoxib and etoricoxib only groups.                                | Too small to have any substantive impact on the meta-analytic estimates, although general direction of results comparable                                       | Low likelihood of bias |

|                                                                                                                                                                                                          |                                                                                                                                                  |                                                                                                                                                                                                                                                                                           |                                                                                                                                                                                                                                                                                                                                                                                       |                                                                                                                                                                     |                                        |
|----------------------------------------------------------------------------------------------------------------------------------------------------------------------------------------------------------|--------------------------------------------------------------------------------------------------------------------------------------------------|-------------------------------------------------------------------------------------------------------------------------------------------------------------------------------------------------------------------------------------------------------------------------------------------|---------------------------------------------------------------------------------------------------------------------------------------------------------------------------------------------------------------------------------------------------------------------------------------------------------------------------------------------------------------------------------------|---------------------------------------------------------------------------------------------------------------------------------------------------------------------|----------------------------------------|
| <p>White et al., 2012. "Practice, practitioner, or placebo? A multifactorial, mixed-methods randomized controlled trial of acupuncture"</p>                                                              | <p>Osteoarthritis patients<br/>Verum acupuncture: N=74<br/>Sham acupuncture: N=73<br/>Mock electrical stimulation: N=74</p>                      | <p>Acupuncture performed twice weekly for 4 weeks. Sham acupuncture involved using Streitberger needles at the same acupuncture points as verum acupuncture. Disconnected electroacupuncture stimulator used for mock transcutaneous electrical stimulation.</p>                          | <p>Pain was diminished from baseline in all groups when measured one week after treatment. There was a statistically significant difference in change of pain between verum acupuncture and mock electrical stimulation. There was no statistically significant difference between verum and sham acupuncture.</p>                                                                    | <p>Despite non-significant results, the central estimate was close to effect size reported in meta-analysis (~0.2) for the comparison of acupuncture with sham.</p> | <p>Low likelihood of bias</p>          |
| <p>Hunter et al., 2012. "Exercise and Auricular Acupuncture for Chronic Low-back Pain A Feasibility Randomized-controlled Trial"</p>                                                                     | <p>Osteoarthritis patients<br/>Exercise only: N=28<br/>Exercise and auricular acupuncture: N=24</p>                                              | <p>Both groups received 12-week exercise treatment program (6 weeks supervised, 6 weeks unsupervised). Participants in exercise + acupuncture group received auricular acupuncture during first 6 weeks of program.</p>                                                                   | <p>"Participants in the EAA group demonstrated a mean improvement of 10.67% points (95% CI, -15.36,-5.97) in the ODQ at 6 months compared with 6.67% points (95% CI, -11.44,-1.90) in the E group. The number of participants achieving the minimal clinically important difference (MCID) (8% points) for the ODQ were similar in both groups (EAA group=41.7%; E group=40.7%)."</p> | <p>Too small to have any significant impact on the meta-analytic estimates, although general direction of results comparable</p>                                    | <p>Not applicable</p>                  |
| <p>Lansdown et al., 2009. "Acupuncture for pain and osteoarthritis of the knee: a pilot study for an open parallel-arm randomised controlled trial"</p>                                                  | <p>Osteoarthritis patients<br/>Acupuncture + "usual care": N=15<br/>"Usual care" only: N=15</p>                                                  | <p>Usual care including any medications or interventions sought by the patients from any healthcare practitioner. Acupuncture group received up to 10 treatments, as necessary.</p>                                                                                                       | <p>The trial was not powered to detect significant changes in outcome; however, there was a statistically significant reduction in WOMAC pain index in the acupuncture group at 3 months. This was not sustained at 12 months.</p>                                                                                                                                                    | <p>Too small to have any significant impact on the meta-analytic estimates</p>                                                                                      | <p>Not applicable</p>                  |
| <p>Molsberger et al., 2010. "German Randomized Acupuncture Trial for chronic shoulder pain (GRASP) – A pragmatic, controlled, patient-blinded, multi-centre trial in an outpatient care environment"</p> | <p>Shoulder pain patients<br/>Verum Acupuncture: N=154<br/>Sham Acupuncture: N=135<br/>Conventional Orthopedic Conservative Treatment: N=135</p> | <p>All acupuncture patients received 15 treatments, with one to three treatments a week. Conventional therapy patients received 50 mg diclofenac daily, as well as 15 treatment sessions using physiotherapy, physical exercise, heat or cold therapy, ultra-sonic treatment or TENS.</p> | <p>There was a significant difference between verum and sham acupuncture and verum acupuncture and conservative therapy in the number of patients who reported at least 50% relief of pain 3 months after the end of treatment.</p>                                                                                                                                                   | <p>Very similar results to those reported in the meta-analysis.</p>                                                                                                 | <p>Intermediate likelihood of bias</p> |

|                                                                                                                                                   |                                                                             |                                                                                                                                         |                                                                                                                                           |                                                                                                                           |              |
|---------------------------------------------------------------------------------------------------------------------------------------------------|-----------------------------------------------------------------------------|-----------------------------------------------------------------------------------------------------------------------------------------|-------------------------------------------------------------------------------------------------------------------------------------------|---------------------------------------------------------------------------------------------------------------------------|--------------|
| Tekin et al. 2013. The effect of dry needling in the treatment of myofascial pain syndrome: a randomized double-blinded placebo-controlled trial. | Myofascial pain patients<br><br>Dry Needling:<br>N =22<br><br>Sham:<br>N=17 | Patients received treatment twice a week for two weeks and once a week for the following two weeks. Patients were told to avoid NSAIDs. | “... even after adjusting for baseline VAS score, the last VAS scores still significantly differ by treatment type (F, 36.2; p < 0.001).” | Too small to have any significant impact on the meta-analytic estimates, although general direction of results comparable | Not assessed |
|---------------------------------------------------------------------------------------------------------------------------------------------------|-----------------------------------------------------------------------------|-----------------------------------------------------------------------------------------------------------------------------------------|-------------------------------------------------------------------------------------------------------------------------------------------|---------------------------------------------------------------------------------------------------------------------------|--------------|
